# Supplementary material for: Lamellar organization of discotic dimer enforced by steric manipulation
Source: Royal Society of Chemistry journal article supplement (doi:10.1039/c3ra22971h), 2013-01-01
Supplement: c3ra22971h.pdf [file c3ra22971h.pdf]

## Supporting Information

### Lamellar Organization of Discotic Dimer Enforced by Steric Manipulation

Chi Wi Ong,<sup>\*a</sup> Ya-Chi Chan,<sup>a</sup> Ming-Che Yeh,<sup>a</sup> Hsin-Ying Lin,<sup>b</sup> and Hsiu-Fu Hsu<sup>b</sup>

<sup>a</sup>*Department of Chemistry, National Sun YatSen University, Kaohsiung 804, Taiwan*

<sup>b</sup>*Department of Chemistry, Tamkang University, Taipei, Taiwan*

\*To whom correspondence should be addressed.

E-mail: cong@mail.nsysu.edu.tw

#### Table of Contents

|                          |    |
|--------------------------|----|
| 1. General Methods ..... | S2 |
| 2. Synthesis .....       | S3 |

#### Supporting Data

|                                                       |     |
|-------------------------------------------------------|-----|
| 3. DSC Profiles of Y.6.P6, Y.6.P10, and Y.6.P12 ..... | S7  |
| 4. POM Micrographs of Y.6.P6 .....                    | S8  |
| 5. XRD Profiles of Y.6.P6, Y.6.P10, and Y.6.P12 ..... | S9  |
| 6. Cluster size calculation .....                     | S12 |
| 7. Supporting References .....                        | S13 |

## 1. General Methods

All reactions were conducted under an atmosphere of nitrogen in oven-dried glassware. Dichloromethane was distilled over calcium hydride. Nuclear magnetic resonance spectra were recorded on a Varian Unity-INOVA-500 MHz spectrometer using  $\text{CDCl}_3$  as solvent. Chemical shifts are reported in ppm relative to residual  $\text{CDCl}_3$  ( $\delta = 7.26$ ,  $^1\text{H}$ ;  $77.0$ ,  $^{13}\text{C}$ ). Mass spectra were obtained on MALDI-TOF. Differential scanning calorimetry (DSC) was measured on a Perkin-Elmer Pyris 1 with heating and cooling rates of  $10^\circ\text{C min}^{-1}$ . Polarized optical microscopy (POM) was carried out on a NikonE600 with a Linkam CI 94 hot stage system. X-Ray powder diffraction (XRD) data were collected on the wiggler beamline BL17A of the National Synchrotron Radiation Research Center (NSRRC), Taiwan, using a triangular bent Si (111) monochromator and a wavelength of  $1.33024\text{\AA}$ . The sample in a 1 mm capillary was mounted on the Huber 5020 diffractometer. An air stream heater is equipped at BL17A beamline and the temperature controller is programmable by a PC with a PID feed back system.

## 2. Synthesis

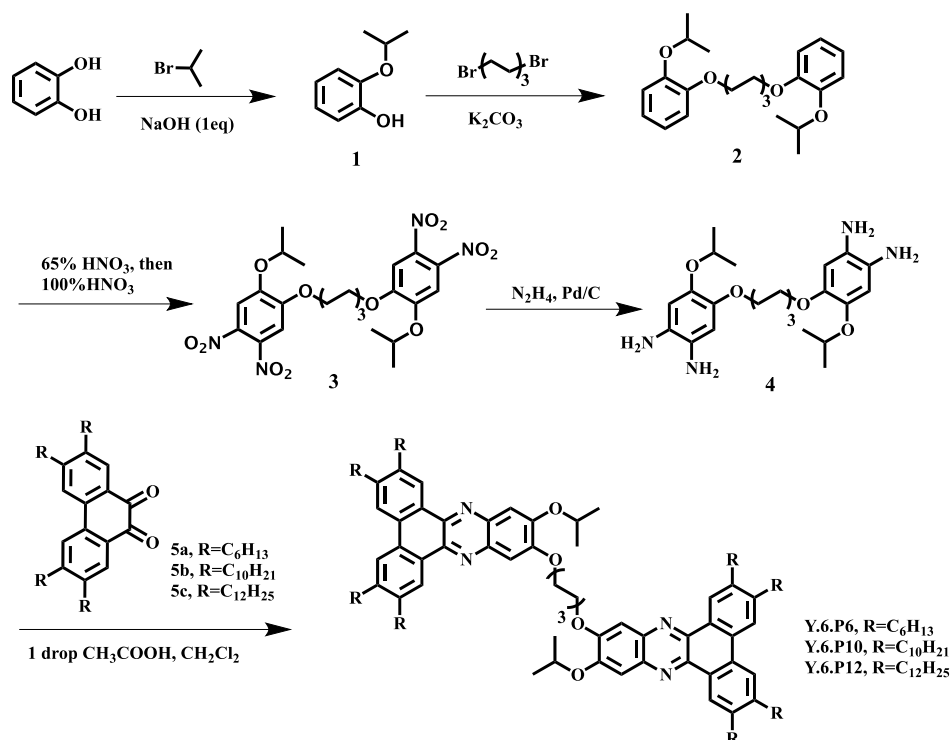

**Scheme S1.** The synthesis of hexaalkoxydibenzo[*a,c*]phenazine dimers containing isopropoxy substituent.

**1,6-bis(2-isopropoxyphenoxy)hexane (2).** 2-isopropoxyphenol (**1**) was prepared according to a reported procedure.<sup>S1</sup> In a two-neck round-bottom flask (100 mL) fitted with a condenser with a nitrogen inlet containing ethanol (50 mL) were added 2-isopropoxyphenol (10g, 65.7mmol) and potassium carbonate (12g, 86.8mmol) and the mixture stirred at room temperature for 1 h. After this time, the 1,6-dibromohexane (8.8g, 36.1mmol) was added, and the reaction mixture was refluxed for one day. The solid residue from the reaction mixture was filtered, and the filtrate was evaporated to dryness. The crude product was then dissolved in hexane and the hexane layer washed with water and brine. The solvent was dried over  $\text{MgSO}_4$  and evaporated. The crude product was further purified by column chromatography on silica gel ( $\text{SiO}_2$ , Hexane/Ether 4/1 v/v) to give pure **2** as a colorless liquid (11.3g, 29.3mmol) in 89% yield.  $^1\text{H}$  NMR (500 MHz,  $\text{CDCl}_3$ ):  $\delta$  (ppm) 6.94~6.86 (m, 8H), 4.45 (m, 2H), 4.00 (t,  $J = 6.5$  Hz, 4H), 1.85 (qui,  $J = 6.5$  Hz,

4H), 1.61~1.33 (m, 16H).  $^{13}\text{C}$  NMR (125MHz,  $\text{CDCl}_3$ ):  $\delta$  150.55, 147.83, 121.95, 120.95, 118.39, 114.33, 72.36, 68.96, 29.30, 25.85, 22.24.

LRMS (ESI)mass:  $m/z$  409 $[\text{M}+\text{Na}]^+$ ; HRMS (ESI)mass: calcd. for  $\text{C}_{24}\text{H}_{34}\text{O}_4[\text{M}+\text{Na}]^+$ ,  $m/z$  =409.2357; found: 409.2349  $[\text{M}+\text{Na}]^+$ .

**1,6-bis(2-isopropoxy-4,5-dinitrophenoxy)hexane (3).** To a two neck round-bottom flask containing dichloromethane (25 mL), acetic acid (25 mL), and compound **2** (5 g, 12.9mmol) cooled to  $0^\circ\text{C}$  was added slowly 65% nitric acid (17 mL). The reaction was allowed to warm to room temperature and stirred for a further 1 h. The mixture was again cooled to  $0^\circ\text{C}$ , 100% nitric acid (8 mL) was added slowly, the mixture was allowed to warm to room temperature and stirred overnight. After completion of the reaction, the reaction mixture was poured into ice/water. The yellow precipitate was collected by filtration and washed with ice/water to give pure **3** as a yellow solid (5.72 g, 10.1mmol) in 78% yield.  $^1\text{H}$  NMR (500MHz,  $\text{CDCl}_3$ ):  $\delta$  (ppm) 6.93~6.85 (m, 8H), 4.46 (m, 2H), 3.98 (t,  $J=6\text{Hz}$ , 4H), 1.81 (qui,  $J=6.5\text{ Hz}$ , 4H), 1.50~1.33 (m, 24H).  $^{13}\text{C}$  NMR (125MHz,  $\text{CDCl}_3$ ):  $\delta$  150.63, 147.81, 121.98, 120.88, 118.48, 114.30, 72.38, 69.07, 29.52, 29.37, 26.03, 22.25.

LRMS (ESI)mass:  $m/z$  589 $[\text{M}+\text{Na}]^+$ ; HRMS (ESI)mass: calcd. for  $\text{C}_{24}\text{H}_{30}\text{N}_4\text{O}_{12}[\text{M}+\text{Na}]^+$ ,  $m/z$  =589.1755; found: 589.1752  $[\text{M}+\text{Na}]^+$ .

**1,6-Bis(2,3,6,7-tetrakis(alkoxy)-12-isopropoxydibenzo[*a,c*]phenazin-11-yloxy)hexane (Y.6. Pn, n=6, 10, and 12).** Compound **5a–c** were prepared according to a reported procedure.<sup>S2</sup> To a solution of **4** (1.0 equivalent) obtained after filtration of the hydrogenation reaction and **5** (2.0 equivalents) in  $\text{CH}_2\text{Cl}_2$  (20 mL) was added acetic acid (2 mL). The reaction mixture was stirred at room temperature for 24 h. Removal of the solvent in vacuo gave crude product that has to be

rigorously purified by column chromatography ( $\text{Al}_2\text{O}_3$ ,  $\text{CH}_2\text{Cl}_2$ ) to give pure **Y.6.P6**, **Y.6.P10**, and **Y.6.P12** as a yellow solid.

**1,6-Bis(2,3,6,7-tetrakis(hexyloxy)-12-isopropoxydibenzo[*a,c*]phenazin-11-yloxy)hexane (Y.6.P6).** Yellow solid (0.79 g, 0.49mmol) in 56% yield;  $^1\text{H}$  NMR (500 MHz,  $\text{CDCl}_3$ ):  $\delta$  8.75 (s, 2H), 8.72 (s, 2H), 7.76 (s, 4H), 7.52 (s, 4H), 4.87 (m, 2H), 4.36~4.26 (m, 20H), 2.09~1.94 (m, 20H), 1.60~1.38 (m, 64H), 0.96~0.92 (m, 24H).  $^{13}\text{C}$  NMR (125 MHz,  $\text{CDCl}_3$ ):  $\delta$  153.2, 151.5, 151.0, 150.9, 149.3, 139.5, 139.1, 139.0, 125.7, 125.6, 124.2, 108.6, 108.0, 107.9, 107.0, 106.5, 71.6, 69.6, 69.1, 69.0, 68.9, 31.7, 31.6, 30.9, 29.4, 29.3, 28.9, 25.84, 25.81, 25.8, 22.6, 21.9, 14.1, 14.0. MALDI-TOF mass: calcd. for  $\text{C}_{100}\text{H}_{142}\text{N}_4\text{O}_{12}$   $[\text{M}+\text{H}]^+$ ,  $m/z$ : 1593.22; found 1593.846  $[\text{M}+\text{H}]^+$ .

**1,6-Bis(2,3,6,7-tetrakis(decyloxy)-12-isopropoxydibenzo[*a,c*]phenazin-11-yloxy)-hexane(Y.6.P10).** Yellow solid (0.72g, 0.35mmol) in 40% yield;  $^1\text{H}$  NMR (500 MHz,  $\text{CDCl}_3$ ):  $\delta$  8.75 (s, 2H), 8.71 (s, 2H), 7.76 (s, 4H), 7.53 (s, 2H), 4.87 (m,2H), 4.35~4.25 (m, 20H), 2.09~1.94 (m, 20H), 1.73~1.29 (m, 128H), 0.91~0.87 (m, 24H).  $^{13}\text{C}$  NMR (125 MHz,  $\text{CDCl}_3$ ):  $\delta$  153.2, 151.5, 151.0, 150.9, 149.3, 139.5, 139.0, 125.7, 125.6, 124.2, 108.6, 108.03, 108.0, 107.0, 106.5, 71.5, 69.6, 69.0, 68.9, 31.9, 29.7, 29.6, 29.54, 29.52, 29.50, 29.4, 28.9, 26.2, 26.1, 25.7, 22.7, 22.0, 14.1. MALDI-TOF mass: calcd. for  $\text{C}_{132}\text{H}_{206}\text{N}_4\text{O}_{12}$   $[\text{M} + \text{H}]^+$ ,  $m/z$  = 2042.07; found: 2042.541  $[\text{M}+\text{H}]^+$ .

**1,6-Bis(2,3,6,7-tetrakis(dodecyloxy)-12-isopropoxydibenzo[*a,c*]phenazin-11-yloxy)-hexane(Y.6.P12).** Yellow solid (0.88 g, 0.39mmol) in 44% yield;  $^1\text{H}$  NMR (500MHz,  $\text{CDCl}_3$ ):  $\delta$  8.74 (s, 2H), 8.70 (s, 2H), 7.75 (s, 4H), 7.52 (s, 2H), 4.87 (m,2H), 4.36~4.26 (m, 20H), 2.09~1.94 (m, 20H), 1.62~1.28 (m, 160H), 0.90~0.87 (m, 24H).  $^{13}\text{C}$  NMR (125MHz,  $\text{CDCl}_3$ ):  $\delta$  153.2,

151.5, 151.0, 150.9, 149.3, 139.5, 139.1, 139.0, 125.7, 125.6, 124.2, 108.6, 108.1, 108.0, 107.0, 106.5, 71.6, 69.7, 69.0, 68.9, 31.9, 29.7, 29.68, 29.56, 29.54, 29.52, 29.4, 29.3 28.9, 26.2, 26.1, 25.8, 22.7, 22.0, 14.1.

MALDI-TOF mass: calcd. for  $\text{C}_{148}\text{H}_{238}\text{N}_4\text{O}_{12}$   $[\text{M}+\text{H}]^+$ ,  $m/z = 2266.49$ ; found: 2266.324  $[\text{M}+\text{H}]^+$ .

## Supporting Data

### 3. DSC Profiles of Y.6.P6, Y.6.P10, and Y.6.P12

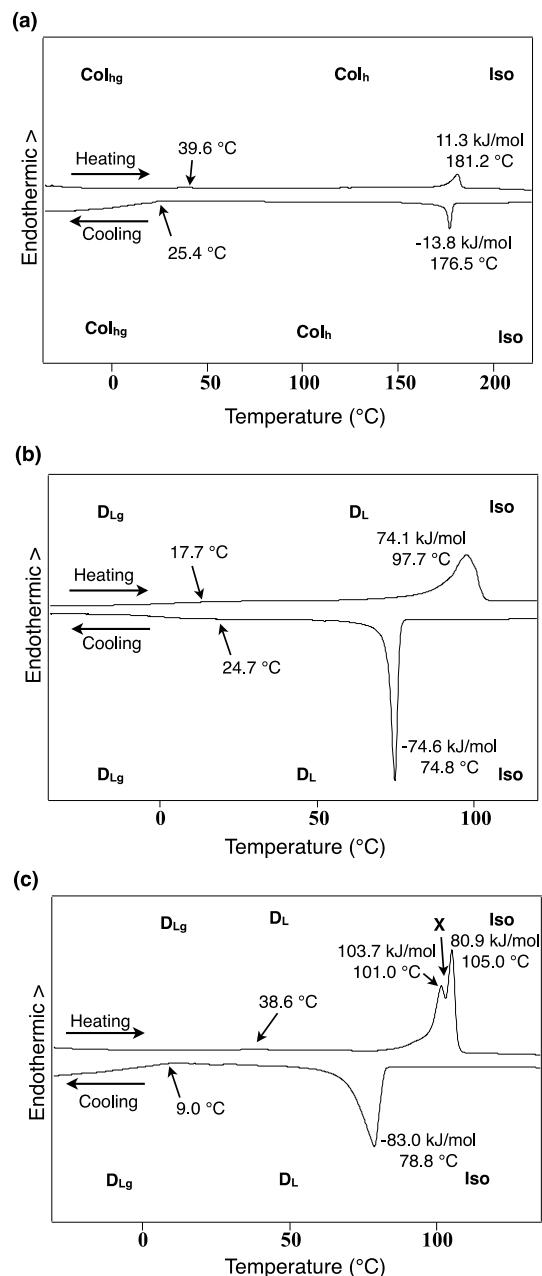

**Figure S1.** DSC traces on second heating/cooling cycle of (a) **Y.6.P6**, (b) **Y.6.P10**, (c) **Y.6.P12** (scan rate 10 °C/min). Cr: crystal,  $Col_h$ : hexagonal columnar,  $Col_{hg}$ : glassy hexagonal columnar phase,  $D_L$ : lamellar phase;  $D_{Lg}$ : glassy lamellar phase, X: unknown phase, Iso: isotropic melt.

#### 4. POM Micrographs

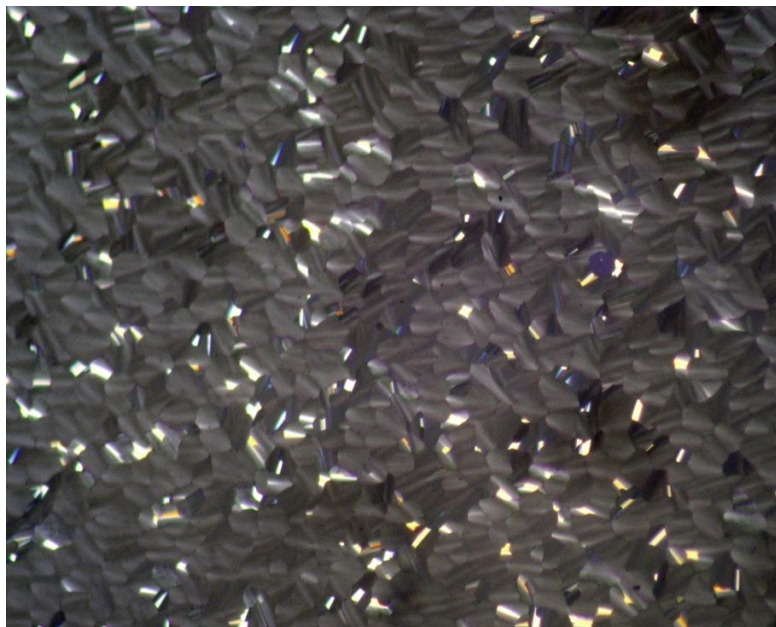

**Figure S2.** POM micrograph of **Y.6.P6** at 80 °C on cooling.



## 5. XRD Profiles of Y.6.P6, Y.6.P10, and Y.6.P12.

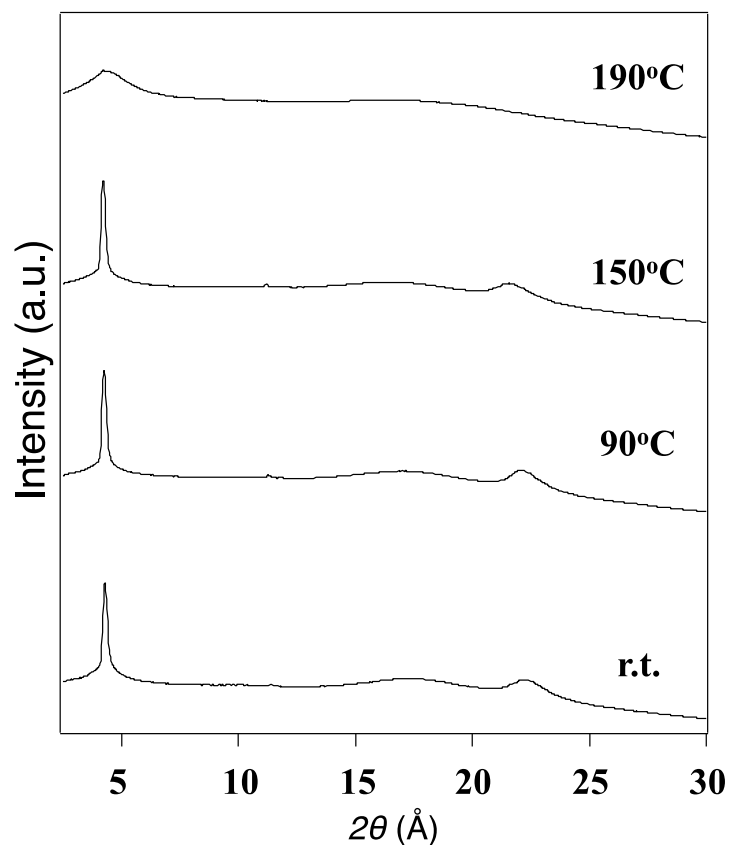

**Figure S3.** XRD patterns of **Y.6.P6** at different temperatures on cooling in a glass capillary. Diffraction peaks with  $d$ -spacings of 17.94, and 6.79 Å (90 °C) are indexed as the diffractions from (100), and (210) planes of the Col<sub>h</sub> structure.

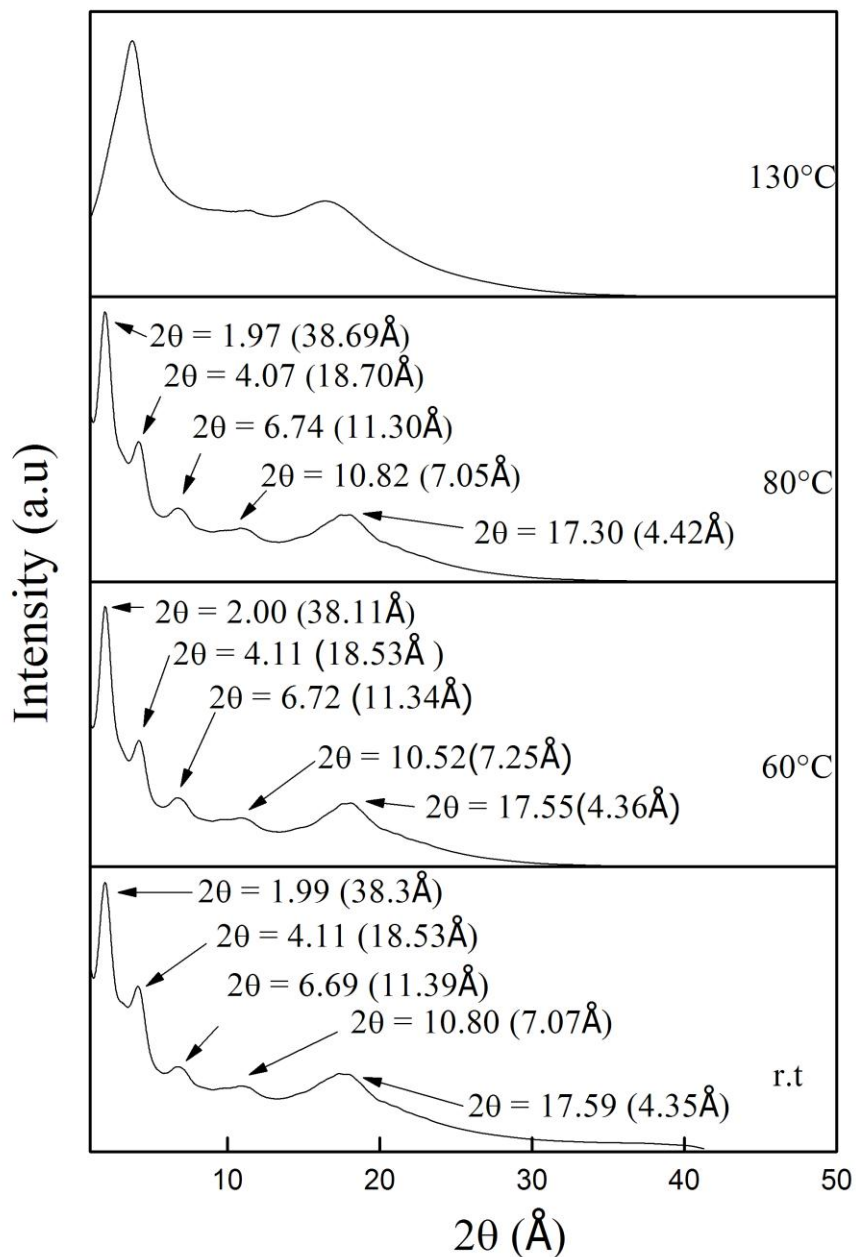

**Figure S4.** XRD patterns of Y.6.P10 at different temperatures on cooling in a glass capillary. Diffraction peaks with  $d$ -spacings of 38.11, 18.53, 11.34, and 7.25  $\text{\AA}$  (60  $^\circ\text{C}$ ) are indexed as the diffractions from (01), (02), (03), and (05) planes of the  $D_L$  structure.

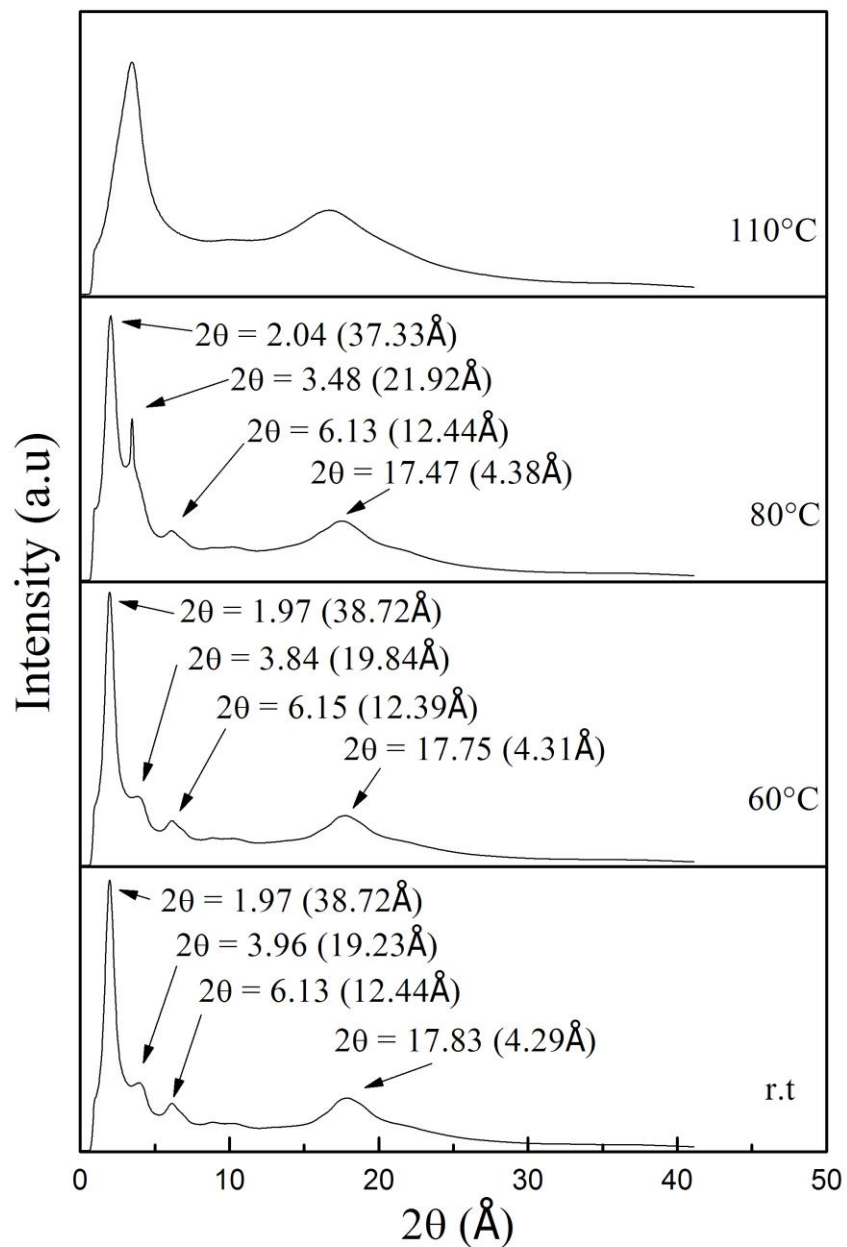

**Figure S5.** XRD patterns of Y.6.P12 at different temperatures on cooling in a glass capillary. Diffraction peaks with  $d$ -spacings of 38.72, 19.84, 12.39, and 7.46 Å (60 °C) are indexed as the diffractions from (01), (02), (03), and (05) planes of the  $D_L$  structure.

## 6. Cluster size calculation

For **Y.6.P12**, the cluster sizes of the  $d01$  ( $d = 38.75$ ) signal of the lamellar phase at 60 °C by Scherrer's equation<sup>S3</sup> is ca. 90 Å. The correlation length of  $L/d$  is calculated to be 2.3, which corresponds to a number of layers of 3.3 ( $= L/d + 1$ ). Hence, the cluster size of layers in the lamellar phase of **Y.6.P12** corresponds to an aggregate of ca. three layers. It should be noted that cluster sizes by Scherrer equation are only estimations.

| Peak | D (Å) | FWHM (degree) | correlation length (Å) |
|------|-------|---------------|------------------------|
| 01   | 38.75 | 0.75          | 90.3                   |
| 02   | 19.29 | 2.33          | 29.2                   |
| 03   | 12.66 | 2.85          | 23.9                   |
| 04   | 7.98  | 3.60          | 18.9                   |
| 05   | 5.84  | 5.16          | 13.2                   |

$\lambda$ : 1.33024 Å

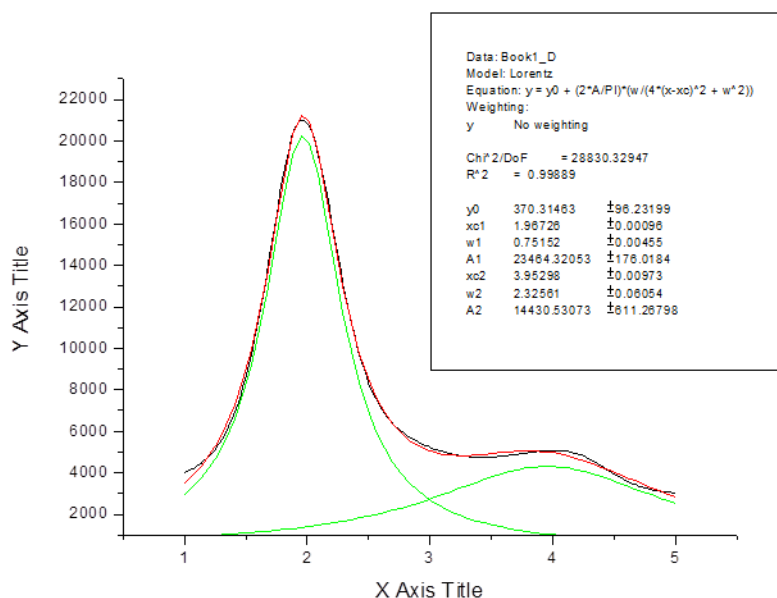

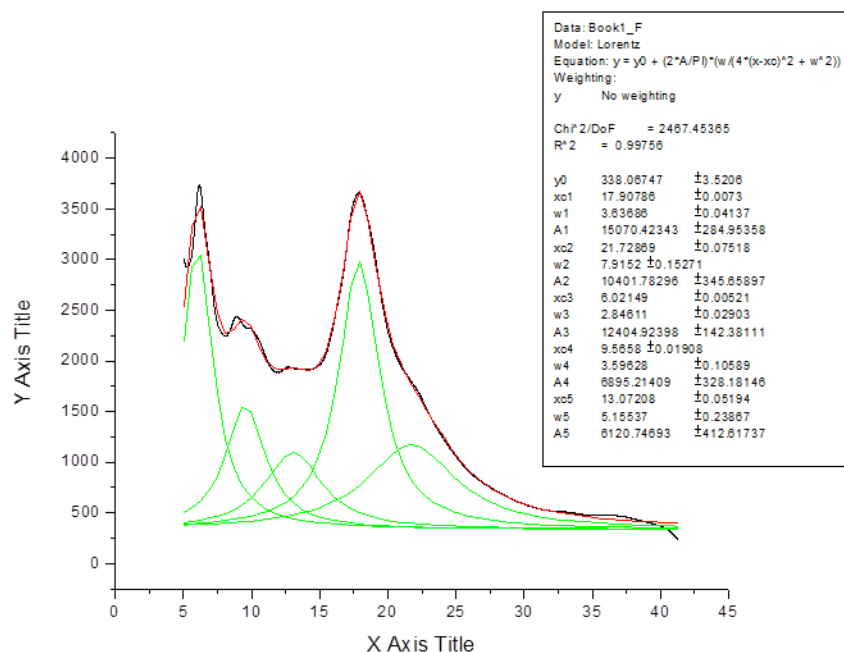

## 7. Supporting References

(S1) Zhou, Z. L.; Weber, E.; Keana, J. F. W. *Tetrahedron Lett.* **1995**, *36*, 7583–7586.

(S2) Ong, C. W.; Hwang, C. Y.; Tzeng, M. C.; Liao, S. C.; Hsu, H. F.; Chang, T. H. *J. Mater. Chem.* **2007**, *17*, 1785–1790.

(S3) a) C. Suryanayana, M. G. Norton, *X-ray Diffraction A Practical Approach*, Plenum Press, New York, **1998**; b) H. P. Klug, L. E. Alexander, *X-ray Diffraction Procedures*, Wiley, New York, **1981**.
